Photographs taken at the Discussion Meeting  
held at the Château d'Audrieu, Calvados,  
24–26 March 1982

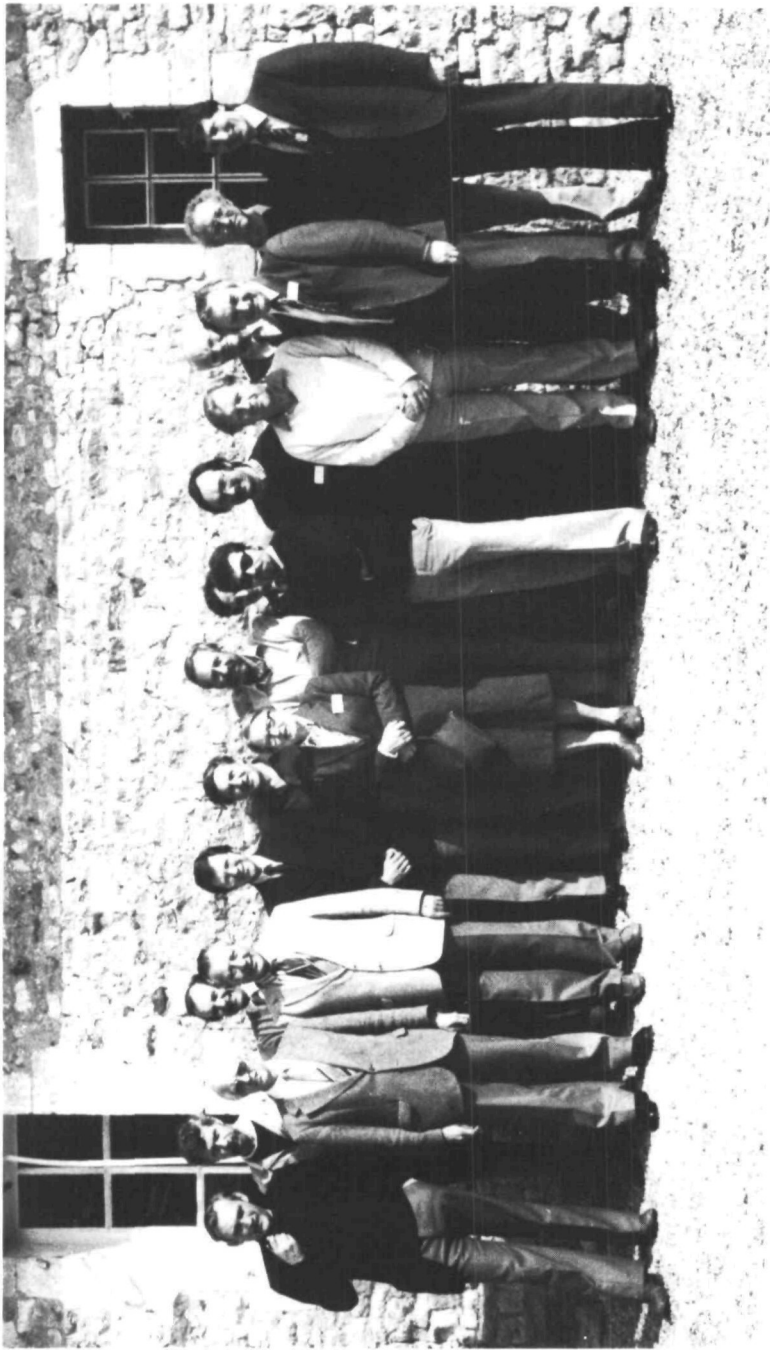

O'Regan    Whipp    Shelton    Butler    Widdicombe    West    Richter    Majcherczyk    Piiper    Taylor  
Coote    Hilton    Mott    Spyer    Randall    Hughes    Jones

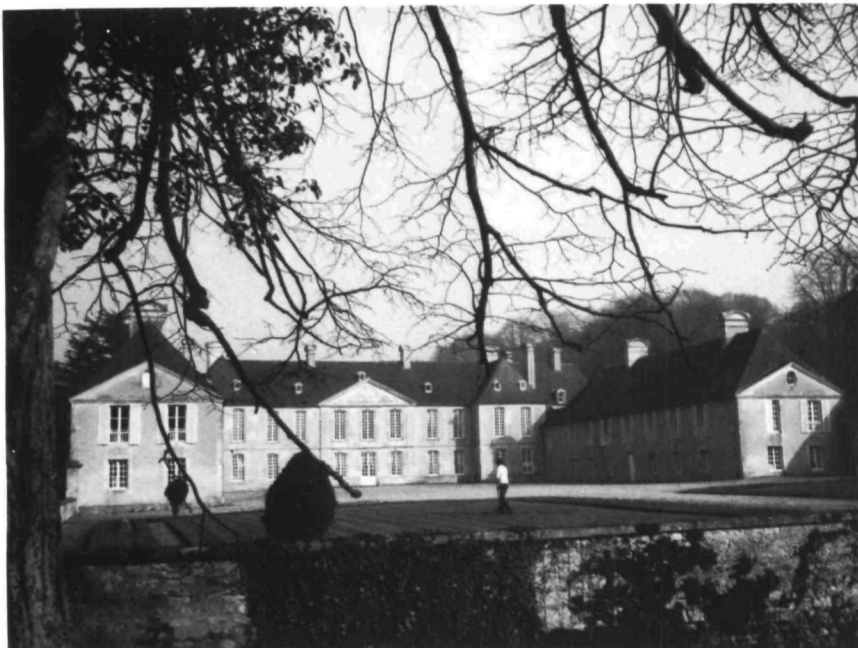

Château d'Audrieu, March 1982

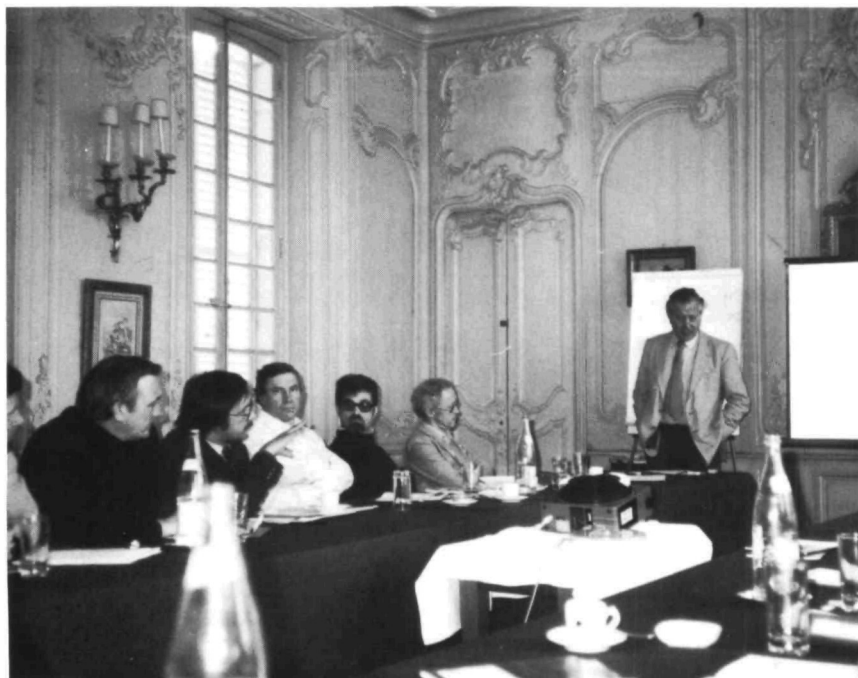

Whipp, O'Regan, Majcherczyk, Widdicombe, Spyer, Taylor,

Hilton

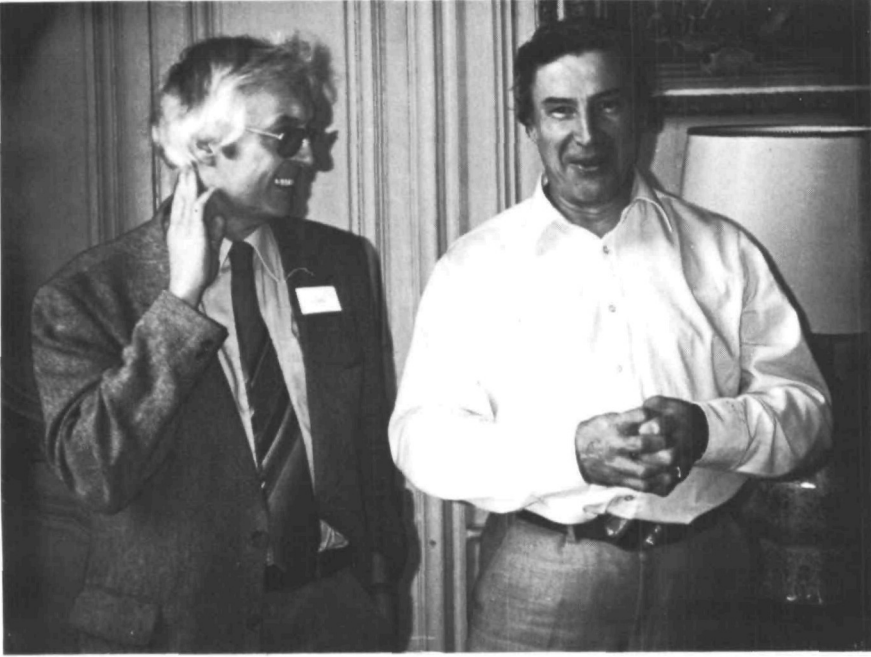

Coote

Widdicombe

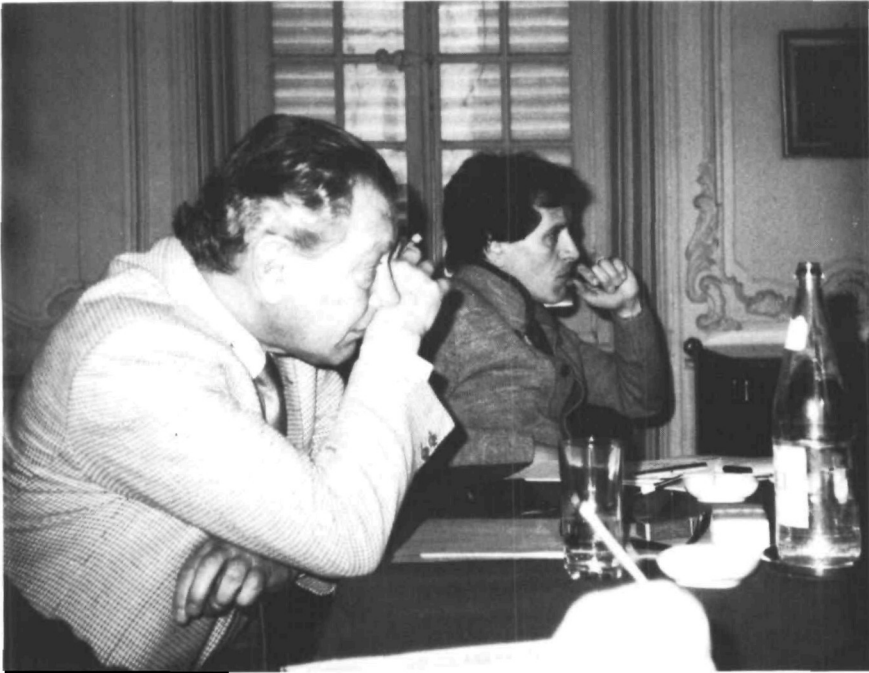

Hilton

Richter

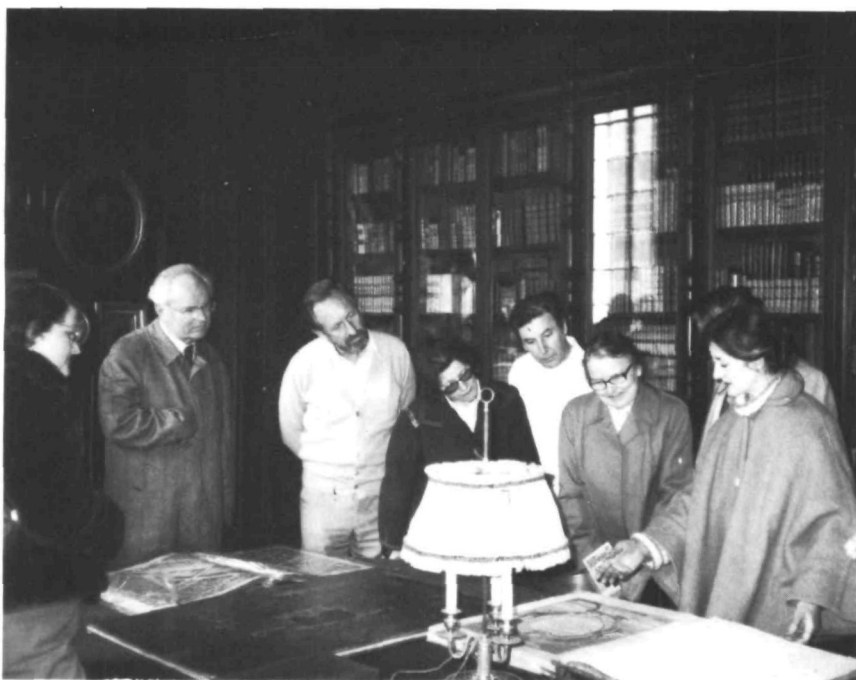

Clements Piiper West Hughes, Widdicombe, Mott guide

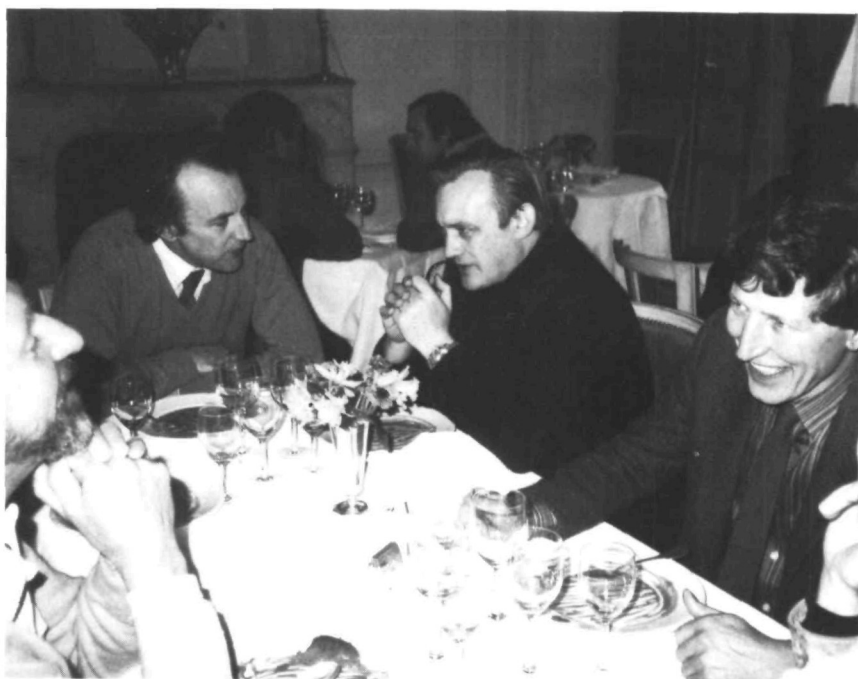

West Shelton O'Regan Jones
